# Supplementary material
Source: JCI journal article supplement (doi:10.1172/jci165544)

Lanes used in Figure

Full unedited gel for Figure 2C

TGF- $\beta$ 1

GAPDH

Full unedited gel for Figure 2D

TGF- $\beta$ 1

GAPDH

Full unedited gel for Figure 5J

PD-1

GAPDH

Full unedited gel for Figure 6A

NFATc1  
(Cytoplasm)

$\alpha$ -Tublin  
(Cytoplasm)

NFATc1  
(Nuclear)

Lamin B1  
(Nuclear)

Full unedited gel for Figure 6C

NFATc1

Lamin B1

Full unedited gel for Figure 6F

PD-1

GAPDH

Full unedited gel for Figure 7G

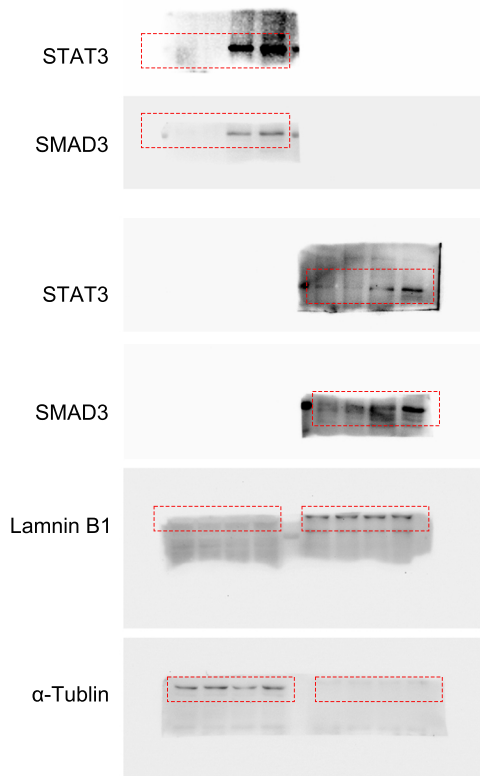

Full unedited gel for Figure 8A

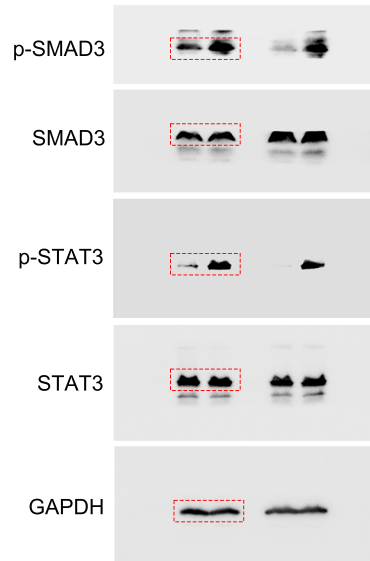

Full unedited gel for Figure 8C

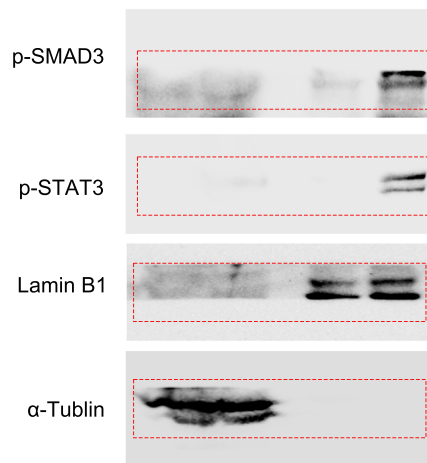

Full unedited gel for Figure 8E

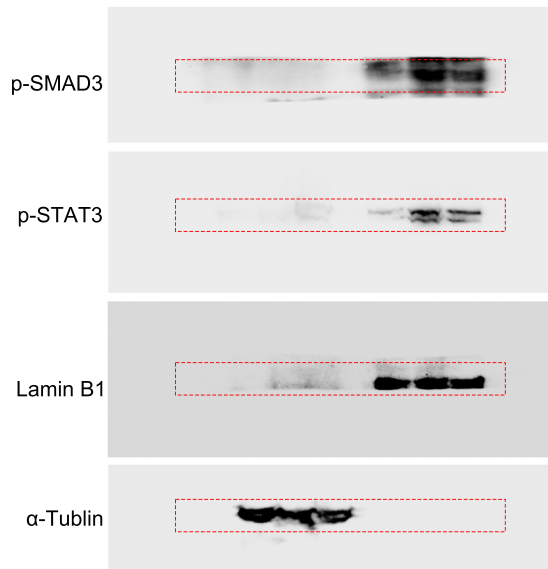

Full unedited gel for Figure 8M

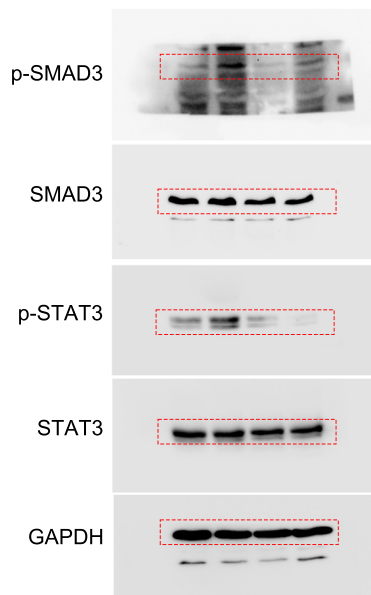

Supplement: sd2 [file 2]
